# Supplementary material for: Social media engagement and cryptocurrency performance
Source: PubMed Central journal article supplement (PMC10174546; doi:10.1371/journal.pone.0284501), 2023-05-11
Supplement: pone.0284501.s003.pdf [file pone.0284501.s003.pdf]

**S1 Table. Cryptocurrency Data.**

Tables 3, 4, and 5 provide more details about the cryptocurrencies used in our study, including their ticker, type of initial offering, fundraising goals, and dates of the initial offering. We also provide the number of tweets collected for each cryptocurrency and the collection dates. The tweets are collected from the beginning of the initial offering up to 30 days later.

| <b>Ticker</b> | <b>Initial Offering Type</b> | <b>Goal (USD)</b> | <b>Initial Offering Dates</b> | <b>Tweet Count</b> |
|---------------|------------------------------|-------------------|-------------------------------|--------------------|
| MATIC         | IEO                          | 5,000,000         | 2019-04-18 to 2019-04-25      | 9,487              |
| PERL          | IEO                          | 6,700,000         | 2019-08-18 to 2019-08-25      | 9,541              |
| BAND          | IEO                          | 5,850,000         | 2019-09-10 to 2019-09-17      | 35,813             |
| TROY          | IEO                          | 4,000,000         | 2019-11-27 to 2019-12-04      | 9,538              |
| WRX           | IEO                          | 2,000,000         | 2020-01-27 to 2020-02-04      | 35,784             |
| CTSI          | IEO                          | 1,500,000         | 2020-04-16 to 2020-04-22      | 35,689             |
| ALPHA         | IEO                          | 2,000,000         | 2020-10-02 to 2020-10-10      | 9,621              |
| INJ           | IEO                          | 3,600,000         | 2020-10-10 to 2020-10-20      | 36,127             |
| AXS           | IEO                          | 2,970,000         | 2020-10-25 to 2020-11-04      | 35,829             |

**Table 3.** Cryptocurrencies created before 2021 in our dataset, their initial offering type, target fund-raising goal, initial offering dates, and total tweets collected.

| <b>Ticker</b> | <b>Initial Offering Type</b> | <b>Goal (USD)</b> | <b>Initial Offering Dates</b> | <b>Tweet Count</b> |
|---------------|------------------------------|-------------------|-------------------------------|--------------------|
| STC           | ICO                          | 21,000,000        | 2021-02-01 to 2021-04-30      | 35,689             |
| SFP           | IEO                          | 5,000,000         | 2021-02-02 to 2021-02-08      | 35,782             |
| ACM           | IEO                          | 1,000,000         | 2021-02-17 to 2021-02-24      | 9,539              |
| RAMEN         | ICO                          | 1,250,000         | 2021-02-19 to 2021-02-19      | 420                |
| MASK          | ITO                          | 2,700,000         | 2021-02-22 to 2021-02-24      | 35,669             |
| ARC           | ICO                          | 7,800,000         | 2021-03-03 to 2021-03-09      | 9,452              |
| SAFEMOON      | ICO                          | 10,000,000        | 2021-03-06 to 2021-03-06      | 58,411             |
| ETHA          | IDO                          | 10,000,000        | 2021-03-04 to 2021-03-04      | 9,441              |
| BELT          | IDO                          | 3,000,000         | 2021-03-10 to 2021-03-10      | 9,468              |
| TARA          | ICO                          | 3,000,000         | 2021-03-11 to 2021-03-11      | 9,486              |
| DEFIT         | IDO                          | 1,111,000         | 2021-03-14 to 2021-03-30      | 35,729             |
| SAFEMARS      | ICO                          | 2,500,000         | 2021-03-19 to 2021-03-19      | 16,935             |
| ORAO          | IDO                          | 1,000,000         | 2021-03-21 to 2021-03-24      | 9,445              |
| VEN           | IDO                          | 7,500,000         | 2021-03-22 to 2021-03-24      | 35,773             |
| CSPR          | IEO                          | 12,000,000        | 2021-03-22 to 2021-03-22      | 9,459              |
| COOK          | IDO                          | 300,000,000       | 2021-03-30 to 2021-03-31      | 35,931             |
| BOSON         | IDO                          | 4,500,000         | 2021-04-06 to 2021-04-07      | 35,808             |
| CERE          | ICO                          | 27,800,000        | 2021-04-07 to 2021-04-15      | 35,797             |
| XNL           | Private Sale                 | 2,300,000         | 2021-04-09 to 2021-04-22      | 35,602             |
| FINE          | IDO                          | 3,090,000         | 2021-04-26 to 2021-04-27      | 9,612              |
| KRYPTO        | IDO                          | 1,500,000         | 2021-04-30 to 2021-04-30      | 35,895             |
| WEC           | IEO                          | 2,300,000         | 2021-05-13 to 2021-05-19      | 35,646             |
| LATTE         | ICO                          | 1,000,000         | 2021-05-19 to 2021-05-19      | 207                |
| NFT           | IEO                          | 2,399,976         | 2021-05-20 to 2021-05-20      | 36,080             |
| HOTCROSS      | IFO                          | 2,500,000         | 2021-05-20 to 2021-05-20      | 35,696             |
| COW           | ICO                          | 1,500,000         | 2021-05-25 to 2021-05-25      | 9,470              |
| CFG           | IEO                          | 3,506,250         | 2021-05-26 to 2021-05-31      | 9,496              |
| LESS          | Presale                      | 1,650,000         | 2021-05-27 to 2021-06-01      | 35,701             |

**Table 4.** Cryptocurrencies created during the first half of 2021 in our dataset, their initial offering type, target fund-raising goal, initial offering dates, and total tweets collected.

| <b>Ticker</b> | <b>Initial Offering Type</b> | <b>Goal (USD)</b> | <b>Initial Offering Dates</b> | <b>Tweet Count</b> |
|---------------|------------------------------|-------------------|-------------------------------|--------------------|
| SAFEBTC       | ICO                          | 2,000,000         | 2021-06-02 to 2021-06-05      | 35,882             |
| ITGR          | ICO                          | 4,410,000         | 2021-06-10 to 2021-06-13      | 35,628             |
| BZZ           | ICO                          | 9,933,953         | 2021-06-13 to 2021-06-14      | 35,658             |
| HMT           | IEO                          | 50,000,000        | 2021-06-17 to 2021-06-22      | 35,619             |
| PALG          | ICO                          | 8,000,000         | 2021-08-05 to 2021-09-05      | 35,600             |
| TUP           | ICO                          | 8,000,000         | 2021-08-21 to 2021-09-05      | 35,712             |
| MPT           | IDO                          | 1,000,000         | 2021-08-29 to 2021-08-30      | 35,604             |
| DMZ           | Seed Sale                    | 1,200,000         | 2021-09-06 to 2021-09-07      | 35,723             |
| FOREX         | ICO                          | 4,410,000         | 2021-09-20 to 2021-09-22      | 35,653             |
| DANA          | ICO                          | 1,000,000         | 2021-10-28 to 2021-10-28      | 35,991             |
| TEX           | IDO                          | 1,980,000         | 2021-11-03 to 2021-11-04      | 35,732             |
| YIN           | IDO                          | 4,500,000         | 2021-11-03 to 2021-11-05      | 35,636             |
| GOG           | ICO                          | 5,500,000         | 2021-11-10 to 2021-11-10      | 9,438              |

**Table 5.** Cryptocurrencies created during the second half of 2021 in our dataset, their initial offering type, target fund-raising goal, initial offering dates, and total tweets collected.
